# Supplementary material for: A Novel Genetic Variant in MBD5 Associated with Severe Epilepsy and Intellectual Disability: Potential Implications on Neural Primary Cilia
Source: MDPI journal article supplement (doi:10.3390/ijms241612603), 2023-08-09
Supplement: s1 [file s1]

# Supplementary Material

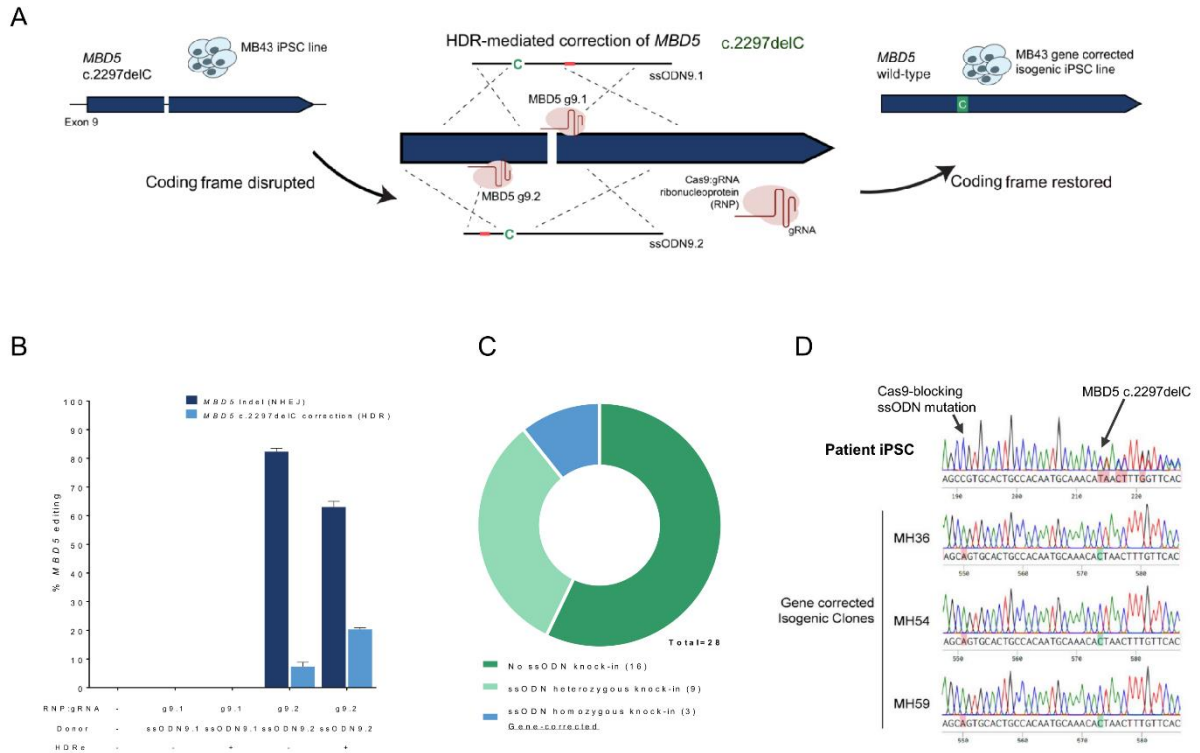

**Figure S1 – Correction of *MBD5* c.2297delC in patient-derived induced pluripotent stem cells by CRISPR/Cas9-mediated homology-directed repair (HDR).** A) Schematic illustration of the HDR-mediated correction of *MBD5* c.2297delC. B) Estimation of *MBD5* editing by Sanger sequence analysis of genomic DNA from patient-derived iPSCs treated with *MBD5*-targeting RNP and respective ssODN template, in the presence or absence of small-molecule HDR enhancer (HDR). Data represented as mean  $\pm$  SD (N=2). C) Genotype of *MBD5* editing in iPS cell clones. Single cell-derived clones from the MBD9.2/ssODN9.2 treated population were isolated and genotyped by Sanger sequencing. D) Sequence alignment of *MBD5* gene-corrected isogenic iPS cell clones (MH36, MH54 and MH59) against parental patient-derived iPS cell line. Sequence position of c.2297delC and ssODN Cas9-blocking mutations are illustrated. Red boxes highlight variations against wild-type *MBD5*, while green boxes highlight the correction of c.2297delC in isogenic iPS cell lines.

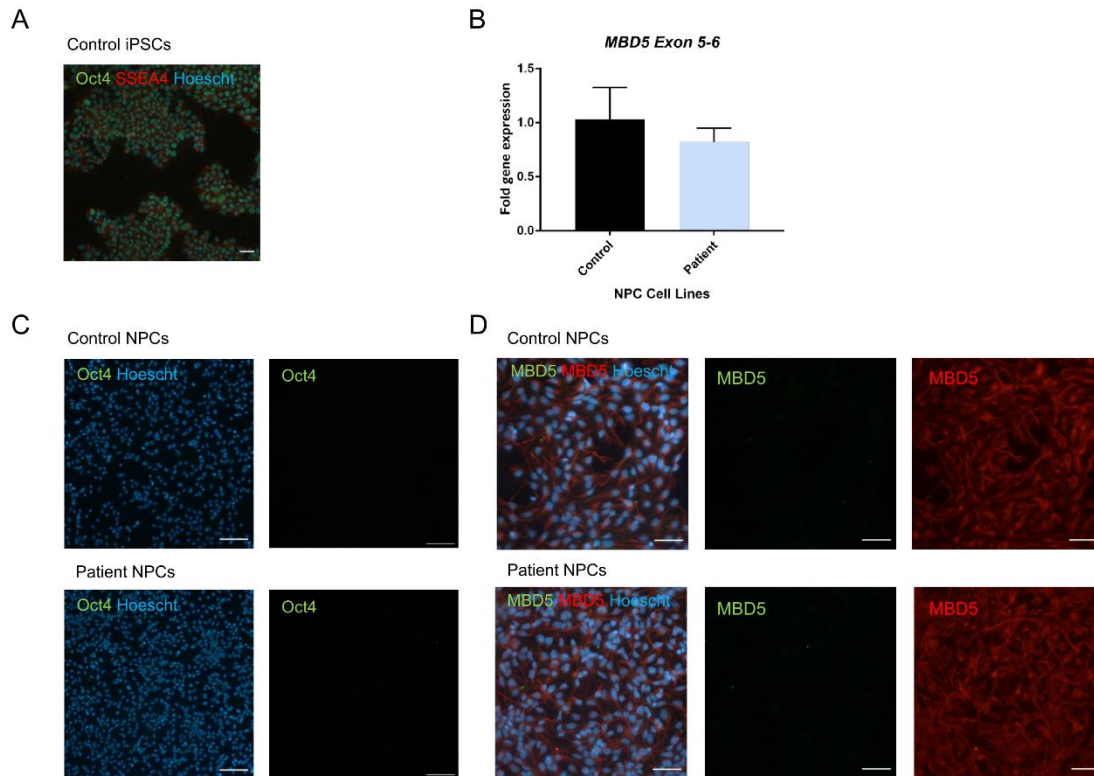

**Figure S2** - A) CRISPR-Cas9-edited iPS cells maintain expression of pluripotency markers OCT4 and SSEA4 (objective: 20x, scale bar: 50  $\mu$ m); B) *MBD5* expression profile of patient-derived and control NPCs, upstream of the deletion site; C) NPCs reveal absence of pluripotency marker OCT4 (objective: 20x, scale bar: 100  $\mu$ m); D) NPCs do not reveal specific MBD5 staining (green: anti-MBD5 Proteintech, 15961-1-AP; red: anti-MBD5 Sigma-Aldrich WH005577M1; scale bar: 100  $\mu$ m).

**Table S1 - *MBD5* variant-associated phenotypes reported in the literature.**

| <i>MBD5</i> Variant                    | Sex | Reported Phenotype  |                         |          |                         |                     |                   | Reference |
|----------------------------------------|-----|---------------------|-------------------------|----------|-------------------------|---------------------|-------------------|-----------|
|                                        |     | Developmental Delay | Intellectual Disability | Seizures | Autistic-like behaviors | Dysmorphic features | Behavior Problems |           |
| Interstitial deletion at 2q21.1-2q23.3 | M   |                     |                         | X        |                         | X                   |                   | [57]      |
| Interstitial deletion at 2q23.1        | F   | X                   | X                       |          | X                       | X                   | X                 | [58]      |
|                                        | F   | X                   | X                       |          | X                       | X                   | X                 |           |
| Interstitial duplication at 2q23.1     | M   | X                   | X                       |          | X                       | X                   |                   |           |
| Interstitial deletion at 2q23.1        | F   | X                   | X                       |          | X                       | X                   | X                 |           |
| Nucleotide substitution (c.440C>G)     | M   | X                   | X                       | X        | X                       | X                   |                   | X         |
| Interstitial Deletion at 2q22.3-2q23.3 | M   | X                   |                         | X        |                         | X                   |                   | X         |
| Nucleotide substitution (c.397+1G>C)   | F   | X                   |                         | X        |                         |                     |                   | X         |
| Interstitial deletion at 2q23.1–23.3   | F   | X                   |                         | X        |                         | X                   | X                 | [61]      |
| Duplication at 2q23.1–2q23.2           | F   | X                   | X                       |          | X                       | X                   | X                 | X         |
| Duplication at 2q22.3q23.2             | M   | X                   | X                       |          | X                       | X                   |                   | X         |

| <i>MBD5</i> Variant                     | Sex | Reported Phenotype  |                         |          |                         |                     |                   | Reference |
|-----------------------------------------|-----|---------------------|-------------------------|----------|-------------------------|---------------------|-------------------|-----------|
|                                         |     | Developmental Delay | Intellectual Disability | Seizures | Autistic-like behaviors | Dysmorphic features | Behavior Problems |           |
| Nucleotide substitution (c.1327G>A)     | M   |                     |                         |          | X                       |                     |                   | [63]      |
| Nucleotide substitution (c.3740T>C)     | F   | X                   |                         |          | X                       |                     |                   |           |
| Nucleotide substitution (c.3806A>G)     | F   | X                   | X                       | X        | X                       |                     | X                 |           |
|                                         | M   | X                   | X                       |          | X                       |                     | X                 |           |
|                                         | M   | X                   |                         |          | X                       |                     | X                 |           |
| Nucleotide substitution (c.3896G>A)     | M   |                     |                         |          | X                       |                     |                   |           |
| Deletion at 2q23.1q23.2                 | F   | X                   |                         | X        |                         | X                   | X                 | [64]      |
| Deletion at 2q23.1                      | F   | X                   |                         | X        | X                       | X                   | X                 | [65]      |
| Deletion at 2q23.1                      | F   |                     | X                       | X        |                         | X                   |                   | [66]      |
| Nucleotide substitution (c.3595G>A)     | F   | X                   |                         | X        | X                       | X                   |                   | [67]      |
| Deletion in <i>MBD5</i> (c.340_347del.) | M   | X                   | X                       | X        |                         |                     | X                 | [68]      |
| Frameshift variant (c.254_255delGA)     | F   | X                   | X                       | X        | X                       | X                   | X                 | [69]      |
|                                         | M   |                     |                         | X        |                         |                     |                   |           |

| <i>MBD5</i> Variant                    | Sex | Reported Phenotype  |                         |          |                         |                     |                   | Reference |
|----------------------------------------|-----|---------------------|-------------------------|----------|-------------------------|---------------------|-------------------|-----------|
|                                        |     | Developmental Delay | Intellectual Disability | Seizures | Autistic-like behaviors | Dysmorphic features | Behavior Problems |           |
| Nucleotide substitution (c.-443G>A)    | M   |                     |                         |          | X                       |                     | X                 | [70]      |
| Nucleotide substitution (c.1862A>T)    | F   |                     |                         |          | X                       |                     |                   |           |
| Nucleotide substitution (c.2550A>G)    | M   |                     |                         | X        |                         |                     |                   |           |
| Nucleotide substitution (c.4045G>A)    | M   | X                   |                         |          |                         |                     | X                 |           |
| Interstitial deletion at 2q23.1        | M   | X                   |                         | X        |                         | X                   | X                 | [71]      |
| Interstitial deletion at 2q22.3-2q23.1 | M   | X                   |                         | X        | X                       | X                   | X                 |           |
| <i>MBD5</i> deletion                   | M   | X                   | X                       | X        | X                       |                     | X                 | [72]      |
|                                        | F   | X                   | X                       | X        | X                       |                     |                   |           |
|                                        | M   | X                   | X                       | X        | X                       |                     |                   |           |
|                                        | M   | X                   | X                       | X        | X                       |                     |                   |           |
|                                        | F   | X                   | X                       | X        | X                       |                     |                   |           |
| Nucleotide substitution (c.217-1G>C)   | M   | X                   | X                       | X        | X                       |                     |                   | [73]      |
| Deletion at 2q23.1–2q23.2              | M   | X                   | X                       | X        |                         | X                   |                   | [74]      |

| <i>MBD5</i> Variant                  | Sex | Reported Phenotype  |                         |          |                         |                     |                   | Reference |
|--------------------------------------|-----|---------------------|-------------------------|----------|-------------------------|---------------------|-------------------|-----------|
|                                      |     | Developmental Delay | Intellectual Disability | Seizures | Autistic-like behaviors | Dysmorphic features | Behavior Problems |           |
| Duplication at 2q23.1                | F   | X                   |                         | X        | X                       | X                   | X                 | [75]      |
| Duplication at 2q23.1                | M   | X                   |                         | X        | X                       | X                   | X                 |           |
| Duplication including 2q22.3- 2q23.3 | F   | X                   |                         | X        | X                       | X                   | X                 |           |
| Duplication including 2q22.3- 2q23.2 | M   | X                   |                         |          | X                       | X                   | X                 |           |
| Duplication including 2q22.3- 2q23.1 | M   | X                   |                         |          | X                       | X                   |                   |           |
| Deletion at 2q23.1                   | M   | X                   |                         | X        | X                       | X                   | X                 | [76]      |
| Complete deletion of <i>MBD5</i>     | M   | X                   | X                       | X        |                         |                     | X                 | [77]      |
| Proximal deletion of <i>MBD5</i>     | M   | X                   | X                       | X        |                         |                     |                   |           |
| Distal deletion of <i>MBD5</i>       | M   | X                   | X                       | X        |                         |                     | X                 |           |
| Proximal deletion of <i>MBD5</i>     | F   | X                   | X                       | X        |                         |                     | X                 |           |
| p.Thr157Glnfs*4 truncation           | F   | X                   | X                       | X        |                         |                     | X                 |           |
| Proximal deletion of <i>MBD5</i>     | F   | X                   | X                       | X        |                         |                     | X                 |           |

| <i>MBD5</i> Variant              | Sex | Reported Phenotype  |                         |          |                         |                     |                   |           | Reference |
|----------------------------------|-----|---------------------|-------------------------|----------|-------------------------|---------------------|-------------------|-----------|-----------|
|                                  |     | Developmental Delay | Intellectual Disability | Seizures | Autistic-like behaviors | Dysmorphic features | Behavior Problems | Hypotonia |           |
| Proximal deletion of <i>MBD5</i> | M   | X                   | X                       | X        |                         |                     | X                 |           |           |
| Proximal deletion of <i>MBD5</i> | M   | X                   | X                       | X        |                         |                     | X                 |           |           |
| Complete deletion of <i>MBD5</i> | M   | X                   | X                       | X        |                         |                     |                   |           |           |
| Proximal deletion of <i>MBD5</i> | F   | X                   | X                       | X        |                         |                     |                   |           |           |
| Complete deletion of <i>MBD5</i> | F   | X                   | X                       | X        |                         |                     | X                 |           |           |
| Proximal deletion of <i>MBD5</i> | M   | X                   | X                       | X        |                         |                     |                   |           |           |
| Proximal deletion of <i>MBD5</i> | F   | X                   | X                       | X        |                         |                     | X                 |           |           |
| Proximal deletion of <i>MBD5</i> | M   | X                   | X                       | X        |                         |                     | X                 |           |           |
| Proximal deletion of <i>MBD5</i> | M   | X                   | X                       | X        |                         |                     | X                 |           |           |
| Proximal deletion of <i>MBD5</i> | M   | X                   | X                       | X        |                         |                     | X                 |           |           |
| Proximal deletion of <i>MBD5</i> | M   | X                   | X                       | X        |                         |                     | X                 |           |           |
| Distal duplication               | F   | X                   |                         | X        |                         |                     |                   |           |           |
| Distal deletion of <i>MBD5</i>   | M   | X                   | X                       | X        |                         |                     | X                 |           |           |

| <i>MBD5</i> Variant                                                           | Sex | Reported Phenotype  |                         |          |                         |                     |                   |           | Reference |
|-------------------------------------------------------------------------------|-----|---------------------|-------------------------|----------|-------------------------|---------------------|-------------------|-----------|-----------|
|                                                                               |     | Developmental Delay | Intellectual Disability | Seizures | Autistic-like behaviors | Dysmorphic features | Behavior Problems | Hypotonia |           |
| Nucleotide substitution (c.598C>T)                                            | M   | X                   | X                       | X        |                         |                     | X                 |           |           |
| Proximal deletion of <i>MBD5</i>                                              | M   | X                   | X                       | X        |                         |                     | X                 |           |           |
| Complete deletion of <i>MBD5</i>                                              | M   | X                   | X                       | X        |                         |                     |                   |           |           |
| Intragenic duplication                                                        | F   | X                   | X                       | X        |                         |                     |                   |           |           |
| Distal deletion of <i>MBD5</i>                                                | M   | X                   | X                       | X        |                         |                     | X                 |           |           |
| Deletion at 2q23.1                                                            | F   | X                   |                         | X        |                         | X                   |                   | X         | [78]      |
| Deletion of <i>MBD5</i>                                                       | M   | X                   | X                       | X        | X                       | X                   |                   |           | [79]      |
| Deletion leading to a frameshift in <i>MBD5</i> (c.2579del.)                  | M   | X                   | X                       |          | X                       | X                   |                   |           | [80]      |
|                                                                               | M   | X                   | X                       | X        |                         | X                   |                   |           |           |
|                                                                               | F   |                     | X                       |          |                         |                     |                   |           |           |
| Reciprocal translocation between chromosomes 2 and 5, deletion at <i>MBD5</i> | F   | X                   |                         | X        | X                       | X                   | X                 | X         | [81]      |
| Deletion at 2q23.1                                                            | F   | X                   |                         | X        |                         |                     |                   |           | [82]      |
| Deletion at 2q23.1                                                            | M   | X                   |                         | X        |                         | X                   |                   |           |           |

| MBD5 Variant                                   | Sex                  | Reported Phenotype  |                         |          |                         |                     |                   | Reference |
|------------------------------------------------|----------------------|---------------------|-------------------------|----------|-------------------------|---------------------|-------------------|-----------|
|                                                |                      | Developmental Delay | Intellectual Disability | Seizures | Autistic-like behaviors | Dysmorphic features | Behavior Problems |           |
|                                                | F                    | X                   |                         |          |                         | X                   |                   |           |
|                                                | F                    | X                   |                         |          |                         | X                   |                   |           |
| Deletion at 2q23.1                             | M                    |                     | X                       | X        | X                       |                     |                   |           |
| Deletion at q22.3-q23.1                        | M                    | X                   |                         |          |                         |                     |                   |           |
| MBD5-specific disruptions and 2q23.1 deletions | Cohort of 65 M and F | X                   |                         | X        | X                       | X                   | X                 | [6]       |
| Intronic deletion of MBD5                      |                      |                     |                         |          | X                       |                     |                   | [83]      |
| Deletions at 2q23.1                            | F                    | X                   |                         | X        | X                       | X                   |                   | [84]      |
|                                                | F                    | X                   |                         | X        | X                       | X                   |                   |           |
|                                                | F                    | X                   |                         |          | X                       | X                   |                   |           |
|                                                | M                    | X                   |                         | X        | X                       | X                   | X                 |           |
|                                                | F                    | X                   |                         | X        | X                       | X                   | X                 |           |
|                                                | M                    | X                   |                         | X        | X                       | X                   |                   |           |
|                                                | M                    | X                   |                         | X        | X                       | X                   |                   |           |
|                                                | M                    | X                   |                         |          | X                       | X                   | X                 |           |

| MBD5 Variant                        | Sex | Reported Phenotype  |                         |          |                         |                     |                   |           | Reference |
|-------------------------------------|-----|---------------------|-------------------------|----------|-------------------------|---------------------|-------------------|-----------|-----------|
|                                     |     | Developmental Delay | Intellectual Disability | Seizures | Autistic-like behaviors | Dysmorphic features | Behavior Problems | Hypotonia |           |
|                                     | F   | X                   |                         | X        | X                       | X                   |                   | X         |           |
|                                     | F   | X                   |                         | X        | X                       | X                   | X                 |           |           |
|                                     | M   | X                   |                         | X        |                         |                     |                   |           |           |
| Frameshift variant (c.2173del.)     | F   | X                   | X                       | X        | X                       |                     | X                 |           | [85]      |
| MBD5 deletion                       | M   | X                   |                         | X        |                         |                     |                   |           | [86]      |
| Nucleotide substitution (c.365C>T)  | F   |                     | X                       | X        |                         | X                   |                   |           | [87]      |
| Nucleotide substitution (c.1885A>G) | M   | X                   |                         | X        |                         |                     |                   |           |           |
| Deletion at 2q23.1                  | F   | X                   | X                       | X        |                         | X                   | X                 | X         | [88]      |
| Deletion of chromosome 2q22.3–q23.3 | F   | X                   | X                       | X        |                         | X                   | X                 | X         |           |
| MBD5 deletion                       | M   |                     | X                       |          | X                       |                     |                   |           | [89]      |

**Table S2** - Primers used for Sanger Sequencing

| <b>Name</b>        | <b>Sequence 5' - 3'</b>    | <b>Tm (°C)</b> |
|--------------------|----------------------------|----------------|
| <i>MBD5</i> Ex9-F  | TGCTAAGGAAGCAGGGTCAGG      | 57.99          |
| <i>MBD5</i> Ex9-F2 | TCGAGCAGCACTAAGAGATAAGC    | 59.17          |
| <i>MBD5</i> Ex9-R  | ATCTTCCCAATAGACAAATCCCTAGC | 56.15          |
| <i>MBD5</i> Ex9-R2 | ACAAACCAGGAAACCCTGCC       | 57.09          |

**Table S3** - *MBD5*-targeting guide RNA (gRNA) and single-stranded oligodeoxynucleotide (ssODN) sequences used for *MBD5* c.2297delC correction.

| gRNAs and ssODNs     | Sequences 5' - 3'                                                                                                                      |
|----------------------|----------------------------------------------------------------------------------------------------------------------------------------|
| <i>MBD5</i> g9.1     | ACAAAGTTATGTTTGCATTG                                                                                                                   |
| <i>MBD5</i> ssODN9.1 | CTGCTAACCAGCTGCATTTTACAGATCCCAGTATGAACTCTAGT<br>GTTCTTCAGAACATACCTTTAAGAGGGGAAGCCGTGCACTGTC<br>ACAATGCAAACACTAACTTTGTTACAGTAACAGTCCAGT |
| <i>MBD5</i> g9.2     | GTTTGCATTGTGGCAGTGCA                                                                                                                   |
| <i>MBD5</i> ssODN9.2 | TTGCCTTGCTCTGCTAACCAGCTGCATTTTACAGATCCCAGTAT<br>GAACTCTAGTGTTCTTCAGAACATACCTTTAAGAGGGGAAGCA<br>GTGCACTGCCACAATGCAAACACTAACTTTGTTACAGTA |

**Table S4** - Primers used for genotyping *MBD5* c.2297Cdel correction.

| <b>Primers</b>     | <b>Sequences 5' - 3'</b>       | <b>Tm<br/>(°C)</b> |
|--------------------|--------------------------------|--------------------|
| <i>MBD5</i> Ex9-F3 | TTGAACCAGCACAATGCTGC           | 59.97              |
| <i>MBD5</i> Ex9-R  | ATCTTCCCAATAGACAAATCCCTA<br>GC | 60.47              |

**Table S5** - Primers used for *MBD5* gene expression assessment.

| <b>Name</b>           | <b>FW Sequence 5' - 3'</b>   | <b>RV Sequence 5' - 3'</b>   | <b>Product Size (bps)</b> |
|-----------------------|------------------------------|------------------------------|---------------------------|
| <i>MBD5</i> - Exon 12 | TTCAGAACTTTCAGGTG<br>AGAATGC | TTGCAACTCACAAGGTG<br>TATCTTG | 140                       |
| <i>GAPDH</i>          | CATGAGAAGTATGACAA<br>CAGCCT  | AGTCCTTCCACGATACC<br>AAAGT   | 113                       |

**Table S6** – NGS panel of sequenced genes.

| Genes assessed via array panel                                                                                                                                                                                                                                                                                                                                                                                                                                                                                                                                                                                                                                                                                                                                                                                                                                                                                                                                                                                                                                                                                                                                                                                                                                                                                                                                                                                                                                                                                                                                                                                                                                                    |
|-----------------------------------------------------------------------------------------------------------------------------------------------------------------------------------------------------------------------------------------------------------------------------------------------------------------------------------------------------------------------------------------------------------------------------------------------------------------------------------------------------------------------------------------------------------------------------------------------------------------------------------------------------------------------------------------------------------------------------------------------------------------------------------------------------------------------------------------------------------------------------------------------------------------------------------------------------------------------------------------------------------------------------------------------------------------------------------------------------------------------------------------------------------------------------------------------------------------------------------------------------------------------------------------------------------------------------------------------------------------------------------------------------------------------------------------------------------------------------------------------------------------------------------------------------------------------------------------------------------------------------------------------------------------------------------|
| AARS, ACY1, AKT3, ALDH7A1, ALG13, AMT, AP3B2, ARFGEF2, ARMGEF15, ARHGEF9, ARV1, ARX, ATP1A2, ATPGAP2, AUH, BCKDK, BRAT1, BSCL2, CACNA1A, CACNA1, CACNA2D2, CACNB4, CAD, CDK5, CDKL5, CHD2, CHRNA2, CHRNA4, CHRNA7, CHRNA2, CLCN2, CLCN4, CLN3, CLN5, CLN6, CLN8, CNTNAP2, COL4A1, COL4A2, COX15, CPA6, CPT2, CRADD, CSF1R, CSTB, CTSD, CTSF, DARS2, DCX, DENND5A, DEPDC5, DNAJC5, DNM1, DNM1L, DOCK7, DYNC1H1, DYRK1A, EEF1A2, EFHC1, EIF2B1, EIF2B2, EIF2B3, EIF2B4, EIF2B5, EMX2, EPM2A, ERBB4, ETHE1, FADD, FARS2, FBXL4, FGF12, FGFR1, FLNA, FOLR1, FOXG1, FRRS1L, GABRA1, GABRB1, GABRB2, GABRB3, GABRD, GABRG2, GAMT, GATM, GCSH, GLDC, GLI2, GNAO1, GOSR2, GRIN1, GRIN2A, GRIN2B, GRIN2D, GUF1, HCN1, HCN2, HEPACAM, HNRNPU, HTR2A, HTRA1, IQSEC2, IRF3, ITPA, KANSL1, KARS, KATNBL, KCNA2, KCNB1, KCNH2, KCNH5, KCNJ10, KCNQ2, KCNQ3, KCNT1, KCNT2, KCTD7, KPNA7, LAMB1, LGI3, LIAS, LIPT2, MAGI2, MBD5, MDH2, MECP2, MFF2C, MFF, MFSD8, MLC1, MTOR, NAXE, NDE1, NDP, NECAP1, NEDD4L, NHLRC1, NOTCH3, NR2F1, NRXN1, NTRK2, PAFAH1B1, PCDH19, PIGA, PIGP, PIGQ, PIGV, PIK3CA, PIK3R2, PLCB1, PNKP, PNPO, POLG, PPP3CA, PPT1, PRICKLE1, PRRT2, PTCH1, PTEN, QARS, RANBP2, RBFOX1, RBFOX3, RELN, RNASET2, ROGDI, RRM2B, SCARB2, SCN1A, SCN1B, SCN2A, SCN3A, SCN5A, SCN8A, SCN9A, SCO2, SERAC1, SERPINI1, SHH, SIK1, SIX3, SLC12A5, SLC13A5, SLC19A3, SLC1A2, SLC25A12, SLC25A22, SLC2A1, SLC35A2, SLC6A1, SLC6A8, SLC6A9, SLC9A6, SPTAN1, SRPX2, ST3GAL3, ST3GAL5, STRADA, STX1B, STXBPI, SUCLA2, SYN1, SYNGAP1, SYNE1, SZT2, TANGO2, TBC1D24, TBC1D7, TBCD, TBCE, TCF4, TMTC3, TNK2, TPK1, TPP1, TRAF3, TRAPPC12, TSC1, TSC2, TUBA1A, UBA5, UBE3A, WDR45, WWOX, YWHAG, ZEB2 |
